# Supplementary material for: Heat Shock 70 kDa Protein Cognate 3 of Brown Planthopper Is Required for Survival and Suppresses Immune Response in Plants
Source: MDPI journal article supplement (doi:10.3390/insects13030299), 2022-03-17
Supplement: s1 [file s1]

**Table S2** The Hsp70 family members in BPH and OsHSP70 and OsHSP71.1 of rice.

| Protein                                                                   | GenBank accession number |
|---------------------------------------------------------------------------|--------------------------|
| <i>Nilaparvata lugens</i> heat shock 70 kDa protein cognate 3 (NIHSP70-3) | XM_022337451.1           |
| <i>Oryza sativa</i> heat shock protein 70 (OsHSP70)                       | XP_015616495.1           |
| <i>O.sativa</i> heat shock protein cognate 1 (OsHSP71.1)                  | BAG93163                 |
| <i>N. lugens</i> heat shock 70 kDa protein cognate 2 (NIHSC70-2)          | KU932402.1               |
| <i>N. lugens</i> heat shock 70 kDa protein cognate 5 (NIHSC70-5)          | XM_022345825.1           |
| <i>N. lugens</i> heat shock 70 kDa protein cognate (NIHSC70)              | ADE34170.1               |
| <i>N. lugens</i> heat shock protein 70 (HSP70)                            | AFJ20626.1               |
