# Supplementary material for: Heat Shock 70 kDa Protein Cognate 3 of Brown Planthopper Is Required for Survival and Suppresses Immune Response in Plants
Source: MDPI journal article supplement (doi:10.3390/insects13030299), 2022-03-17
Supplement: s1 [file s1]

Table S1 List of qRT-PCR primers used in this study.

| Primer Name         | Sequence                                                 |
|---------------------|----------------------------------------------------------|
| <i>N/Hsp70-2F</i>   | GGGGACAAGTTTGTACAAAAAAGCAGGCTTCATGAACTAGAATT<br>AATTGGC  |
| <i>N/Hsp70-2R</i>   | GGGGACCACTTTGTACAAGAAAGCTGGGTCAAGCTCGTCCTTGA<br>GATCGTC  |
| <i>N/Hsp70-2F-D</i> | GGGGACAAGTTTGTACAAAAAAGCAGGCTTCATGGCGGATGAAG<br>AGAAAGGA |
| <i>qN/Hsp70-2R</i>  | AGCACATTCTTCTCGCCCTC                                     |
| $\beta$ -actin-F    | GACAGGATGCAGAAGGAAATCA                                   |
| $\beta$ -actin-R    | GACTCGTCGTACTCCTGCTTTG                                   |
| <i>N/Hsp70-2-RN</i> | ATGAACTAGAATTAATTGGC                                     |
| Ai-F                |                                                          |
| <i>N/Hsp70-2-RN</i> | AAGCTCGTCCTTGAGATCGTC                                    |
| Ai-R                |                                                          |
| <i>qNbPR1-F</i>     | TGAGATGTGGGTCGATGAGA                                     |
| <i>qNbPR1-R</i>     | CGAGTTACGCCAAACCACTT                                     |
| <i>qNbPR2-F</i>     | CAATGCATTAGCAGCAGCAG                                     |
| <i>qNbPR2-R</i>     | ATCTTTGGGCGGGTAGGTAT                                     |
| <i>qNbPR3-F</i>     | TGGGGTTATTGCTGGCTTAG                                     |
| <i>qNbPR3-R</i>     | GGGTCATCCAAAACCAGAGA                                     |
| <i>qNbPR4-F</i>     | GGCCAAGATTCCTGTGGTAGAT                                   |
| <i>qNbPR4-R</i>     | CACTGTTGTTTGAGTTCCTGTTCT                                 |
| <i>qNbActin-F</i>   | CGGAATCCACGAGACTACATAC                                   |
| <i>qNbActin-R</i>   | GGGAAGCCAAGATAGAGC                                       |
| T7                  | TAATACGACTCACTATAGGGAGA                                  |
